# Supplementary material for: Transcriptomic and Metabolomic Studies Reveal That Toll-like Receptor 2 Has a Role in Glucose-Related Metabolism in Unchallenged Zebrafish Larvae (Danio rerio)
Source: MDPI journal article supplement (doi:10.3390/biology12020323), 2023-02-16
Supplement: s1 [file s1]

**Table S1.** Sequences of primers used in qPCR reactions

| Primers         | Sequences                       | Application |
|-----------------|---------------------------------|-------------|
| <i>gpib</i> -F  | 5'...ATCATCGCATCCAAGACA...3'    | qPCR        |
| <i>gpib</i> -R  | 5'...GTGGCAGACCATAGGGAG...3'    | qPCR        |
| <i>pfkma</i> -F | 5'...ATCCTGAACGTGGGTGCT...3'    | qPCR        |
| <i>pfkma</i> -R | 5'...GTTCCCTGTCCAATCTC...3'     | qPCR        |
| <i>pck2</i> -F  | 5'...AGTGCTTTGCTCTTCGTATTG...3' | q-PCR       |
| <i>pck2</i> -R  | 5'...CACCTGAGGATTTGTGATTG...3'  | qPCR        |
| <i>ppial</i> -F | 5'...TGAGCCGCAACAGTAATC...3'    | Reference   |
| <i>ppial</i> -R | 5'...AAGGGAAAAGGAAGTGAAAG...3'  | Reference   |

**Table S2.** 149 differential expressed genes (DEGs) in *tlr2*<sup>-/-</sup> versus *tlr2*<sup>+/+</sup> zebrafish larvae groups.

| Ensembl ID         | Gene name      | log2 Fold Change | Svalue      | zfin ID              |
|--------------------|----------------|------------------|-------------|----------------------|
| ENSDARG00000111312 | pabpc4         | -11.50886308     | 4.85E-05    | ZDB-GENE-030131-9663 |
| ENSDARG00000094732 | mical3b        | -3.650047838     | 4.02E-13    | ZDB-GENE-050211-1    |
| ENSDARG00000086107 | MTERF1         | -2.608449278     | 6.87E-05    |                      |
| ENSDARG00000097635 | wu:fb18f06     | -2.382020806     | 0.000325116 | ZDB-GENE-030131-261  |
| ENSDARG00000112325 | ankrd29        | -2.37796162      | 0.002841557 | ZDB-GENE-050208-655  |
| ENSDARG00000102185 | PCDH8          | -2.232158033     | 0.000494177 | ZDB-GENE-120215-215  |
| ENSDARG00000023900 | casd1          | -2.15233006      | 0.00012233  | ZDB-GENE-060503-329  |
| ENSDARG00000069085 | ints2          | -1.966907862     | 0.001856366 | ZDB-GENE-050522-148  |
| ENSDARG00000035043 | pfdn5          | -1.895289969     | 0.001392597 | ZDB-GENE-030131-6858 |
| ENSDARG00000062363 | phex           | -1.862050992     | 0.000367465 | ZDB-GENE-030103-2    |
| ENSDARG00000036076 | heatr3         | -1.847085627     | 0.004946941 | ZDB-GENE-040426-1876 |
| ENSDARG00000020956 | pck2           | -1.798342381     | 0.002386872 | ZDB-GENE-040426-2266 |
| ENSDARG00000007344 | tcap           | -1.724504939     | 0.001953038 | ZDB-GENE-070501-5    |
| ENSDARG00000069269 | wdr35          | -1.717885571     | 0.004152186 | ZDB-GENE-060810-148  |
| ENSDARG00000012140 | ccnl1b         | -1.697296922     | 9.27E-05    | ZDB-GENE-030131-4813 |
| ENSDARG00000020212 | slc1a1         | -1.63319199      | 0.001648019 | ZDB-GENE-040718-414  |
| ENSDARG00000074680 | rims1a         | -1.618739134     | 0.002337767 | ZDB-GENE-090312-135  |
| ENSDARG00000103826 | gpib           | -1.571970434     | 3.24E-05    | ZDB-GENE-020513-3    |
| ENSDARG00000093658 | tm7sf3         | -1.567456266     | 0.000265324 | ZDB-GENE-030131-1770 |
| ENSDARG00000041895 | cad            | -1.533319317     | 0.000229391 | ZDB-GENE-021030-4    |
| ENSDARG00000053222 | asb5b          | -1.518376915     | 0.00394881  | ZDB-GENE-050417-271  |
| ENSDARG00000042892 | paip1          | -1.51094519      | 0.000514962 | ZDB-GENE-040801-247  |
| ENSDARG00000027649 | cpsf3          | -1.453183989     | 0.002684177 | ZDB-GENE-030131-3275 |
| ENSDARG00000104835 | map3k4         | -1.434843344     | 0.000131865 | ZDB-GENE-990603-4    |
| ENSDARG00000039269 | arg2           | -1.434623812     | 0.000103138 | ZDB-GENE-030131-1334 |
| ENSDARG00000030537 | psmc1a         | -1.412975187     | 0.001100234 | ZDB-GENE-030131-8730 |
| ENSDARG00000040985 | itgbl1         | -1.408737717     | 0.00375369  | ZDB-GENE-050522-410  |
| ENSDARG00000008363 | mcl1b          | -1.389134145     | 0.001357441 | ZDB-GENE-030825-1    |
| ENSDARG00000004930 | lmo7a          | -1.339174696     | 0.000180495 | ZDB-GENE-030219-74   |
| ENSDARG00000026634 | ehmt1b         | -1.32028779      | 0.001462314 | ZDB-GENE-080515-3    |
| ENSDARG00000093768 | prr18          | -1.307904661     | 0.000303383 | ZDB-GENE-081107-6    |
| ENSDARG00000116161 | trip12         | -1.300353357     | 0.002435134 | ZDB-GENE-041111-262  |
| ENSDARG00000002745 | tdh            | -1.297655367     | 1.15E-05    | ZDB-GENE-040426-2379 |
| ENSDARG00000090369 | zgc:86896      | -1.275307853     | 2.78E-05    | ZDB-GENE-040625-80   |
| ENSDARG00000020711 | rrm2           | -1.259997735     | 0.001812058 | ZDB-GENE-990415-25   |
| ENSDARG00000104028 | si:dkey-74k8.3 | -1.213805257     | 0.001323098 | ZDB-GENE-141222-20   |
| ENSDARG00000071445 | myoz1b         | -1.193692113     | 0.001193759 | ZDB-GENE-040718-146  |
| ENSDARG00000101362 | mibp           | -1.16819841      | 0.002001775 | ZDB-GENE-030404-1    |
| ENSDARG00000076066 | march6         | -1.05686572      | 0.000976824 | ZDB-GENE-070912-530  |

|                      |                |              |             |                      |
|----------------------|----------------|--------------|-------------|----------------------|
| ENSDARG00000014179   | pfkma          | -1.054113785 | 0.00362629  | ZDB-GENE-040912-135  |
| ENSDARG00000076667   | ccng1          | -1.029350676 | 0.000203098 | ZDB-GENE-020322-1    |
| ENSDARG00000059070   | gars           | -0.985407815 | 0.003399213 | ZDB-GENE-030131-9174 |
| ENSDARG00000007216   | abce1          | -0.980665904 | 0.002288344 | ZDB-GENE-040426-1995 |
| ENSDARG00000009136   | tp53bp2a       | -0.978283727 | 0.00456419  | ZDB-GENE-040516-8    |
| ENSDARG000000104267  | postnb         | -0.954685124 | 0.001728197 | ZDB-GENE-030131-9120 |
| ENSDARG000000037559  | uba1           | -0.951795928 | 0.002098331 | ZDB-GENE-040426-2009 |
| ENSDARG00000070043   | dars           | -0.949478772 | 0.000584858 | ZDB-GENE-061110-135  |
| ENSDARG00000005908   | clk4b          | -0.938504204 | 0.004636476 | ZDB-GENE-050227-19   |
| ENSDARG000000039502  | eef1a1a        | -0.92364574  | 0.003097816 | ZDB-GENE-030131-8278 |
| ENSDARG000000035869  | azin1b         | -0.917667197 | 0.003509696 | ZDB-GENE-030121-1    |
| ENSDARG000000102415  | scinla         | -0.888267996 | 0.002145779 | ZDB-GENE-030131-2005 |
| ENSDARG000000032575  | ywhaz          | -0.886185801 | 0.001426919 | ZDB-GENE-030131-8554 |
| ENSDARG000000014763  | arf2a          | -0.874375665 | 0.001039742 | ZDB-GENE-040122-4    |
| ENSDARG000000011510  | rcc2           | -0.864013114 | 0.002789533 | ZDB-GENE-040426-2213 |
| ENSDARG000000036427  | slc3a2a        | -0.862452704 | 0.001534392 | ZDB-GENE-000831-3    |
| ENSDARG000000012505  | u2af2a         | -0.859597877 | 0.003296305 | ZDB-GENE-050706-131  |
| ENSDARG000000013755  | actn3a         | -0.846336643 | 0.001008642 | ZDB-GENE-000329-9    |
| ENSDARG000000006766  | snd1           | -0.835038259 | 0.002240737 | ZDB-GENE-030131-3124 |
| ENSDARG000000053810  | hnrbpc         | -0.811196091 | 0.004792526 | ZDB-GENE-040426-2043 |
| ENSDARG000000009881  | ier5           | -0.795401148 | 0.003452196 | ZDB-GENE-030616-127  |
| ENSDARG000000044526  | camk1ga        | 0.722898297  | 0.004287985 | ZDB-GENE-030131-7594 |
| ENSDARG000000103498  | epd            | 0.835312342  | 0.004084159 | ZDB-GENE-980526-111  |
| ENSDARG000000016181  | trim33         | 0.859464059  | 0.002893176 | ZDB-GENE-030131-2773 |
| ENSDARG000000078567  | lonrf1l        | 0.891343304  | 0.004355802 | ZDB-GENE-081104-397  |
| ENSDARG000000056511  | arr3a          | 0.907218606  | 0.00075928  | ZDB-GENE-040718-102  |
| ENSDARG000000099380  | rpl13          | 0.913049041  | 0.004220261 | ZDB-GENE-031007-1    |
| ENSDARG000000008861  | tfap2e         | 0.913995012  | 0.000822459 | ZDB-GENE-040426-1455 |
| ENSDARG000000015222  | cbll1          | 0.93711543   | 0.002484589 | ZDB-GENE-040426-691  |
| ENSDARG000000022767  | apobb.1        | 0.948168919  | 0.001688517 | ZDB-GENE-030131-9732 |
| ENSDARG000000044852  | wbp2nl         | 0.951956769  | 0.003567714 | ZDB-GENE-030131-4012 |
| ENSDARG000000044684  | rbp4l          | 0.956030354  | 0.003883762 | ZDB-GENE-030131-7591 |
| ENSDARG0000000101637 | ccnd1          | 0.958626191  | 0.00334795  | ZDB-GENE-980526-176  |
| ENSDARG0000000105154 | creg1          | 0.958820675  | 0.004714576 | ZDB-GENE-070112-2042 |
| ENSDARG000000077934  | tegt           | 0.965657623  | 0.000853318 | ZDB-GENE-030826-10   |
| ENSDARG0000000102147 | fem1c          | 0.976692308  | 0.004015451 | ZDB-GENE-031008-3    |
| ENSDARG0000000104316 | CABZ01078055.1 | 0.981499354  | 0.003690451 |                      |
| ENSDARG000000014717  | dync1h1        | 1.01263213   | 0.002584147 | ZDB-GENE-030131-7050 |
| ENSDARG000000042458  | rfc4           | 1.01482853   | 0.003197451 | ZDB-GENE-040824-3    |
| ENSDARG000000038028  | ndufa6         | 1.023404737  | 0.003046918 | ZDB-GENE-040426-1124 |
| ENSDARG000000099640  | eed            | 1.040600594  | 0.001570851 | ZDB-GENE-050417-287  |
| ENSDARG0000000101180 | mcm7           | 1.041069767  | 0.002736753 | ZDB-GENE-020419-27   |
| ENSDARG000000042535  | actc1a         | 1.049163287  | 0.004495255 | ZDB-GENE-040520-4    |
| ENSDARG000000087206  | cct2           | 1.057455245  | 0.003818091 | ZDB-GENE-020419-6    |
| ENSDARG000000039302  | terfa          | 1.064344931  | 0.003246386 | ZDB-GENE-020419-38   |
| ENSDARG000000032296  | pomp           | 1.064403344  | 0.001162289 | ZDB-GENE-040801-10   |
| ENSDARG000000099406  | lrit1b         | 1.066999323  | 0.001608373 | ZDB-GENE-060616-45   |
| ENSDARG000000067966  | fem1a          | 1.077436053  | 0.004425456 | ZDB-GENE-030131-5824 |
| ENSDARG000000089663  | lsm3           | 1.082090359  | 0.003147929 | ZDB-GENE-161207-2    |
| ENSDARG000000087873  | eevs           | 1.09985931   | 0.000656731 | ZDB-GENE-131121-365  |
| ENSDARG000000002193  | rho            | 1.100194463  | 0.001767905 | ZDB-GENE-990415-271  |
| ENSDARG000000090389  | ndufv3         | 1.121415365  | 0.002050292 | ZDB-GENE-030131-6500 |
| ENSDARG000000006345  | med17          | 1.127559972  | 0.000731888 | ZDB-GENE-040302-1    |
| ENSDARG000000075201  | inpp4b         | 1.128604718  | 0.000883321 | ZDB-GENE-090312-97   |
| ENSDARG000000076618  | tm2d3          | 1.152316283  | 0.000408743 | ZDB-GENE-070620-20   |

|                    |                   |             |             |                      |
|--------------------|-------------------|-------------|-------------|----------------------|
| ENSDARG00000052840 | ndufs4            | 1.16071928  | 7.62E-05    | ZDB-GENE-050522-421  |
| ENSDARG00000102558 | pde6ha            | 1.165457384 | 0.00070644  | ZDB-GENE-040426-1754 |
| ENSDARG00000040557 | exosc5            | 1.176202152 | 0.002634434 | ZDB-GENE-060503-675  |
| ENSDARG00000011125 | snrpb             | 1.204146061 | 0.000681834 | ZDB-GENE-040426-1819 |
| ENSDARG00000036359 | riox2             | 1.214369629 | 0.002193604 | ZDB-GENE-040426-1283 |
| ENSDARG00000039934 | hlcs              | 1.224335366 | 0.001130432 | ZDB-GENE-030131-5333 |
| ENSDARG00000098934 | rrp7a             | 1.226532022 | 0.000140871 | ZDB-GENE-050417-38   |
| ENSDARG00000103099 | EARS2             | 1.231474585 | 0.000388234 | ZDB-GENE-060825-214  |
| ENSDARG00000092787 | si:dkey-88p24.11  | 1.259627739 | 0.002944792 | ZDB-GENE-030131-8991 |
| ENSDARG00000086453 | cx52.9            | 1.264161403 | 0.002995968 | ZDB-GENE-040426-2421 |
| ENSDARG00000070386 | krtcap2           | 1.272348773 | 0.000791182 | ZDB-GENE-060825-91   |
| ENSDARG00000086411 | srsf10b           | 1.282514336 | 0.000538685 | ZDB-GENE-040426-1415 |
| ENSDARG00000014556 | serpinb1l3        | 1.287112273 | 0.000428599 | ZDB-GENE-030131-7059 |
| ENSDARG00000063914 | mt-nd3            | 1.296136716 | 0.000215024 | ZDB-GENE-011205-9    |
| ENSDARG00000075883 | bub3              | 1.302003039 | 6.11E-05    | ZDB-GENE-041010-210  |
| ENSDARG00000101347 | CABZ01068251.1    | 1.308592166 | 0.000191176 |                      |
| ENSDARG00000025581 | rpl10             | 1.318690312 | 0.000346299 | ZDB-GENE-030131-8656 |
| ENSDARG00000069109 | ssscal            | 1.330924829 | 0.002533847 | ZDB-GENE-041010-102  |
| ENSDARG00000100409 | camlg             | 1.335267365 | 0.000472736 | ZDB-GENE-040426-2407 |
| ENSDARG00000089362 | grn1              | 1.423718291 | 0.001224971 | ZDB-GENE-060103-1    |
| ENSDARG00000013726 | ap4b1             | 1.435379757 | 0.000112923 | ZDB-GENE-040426-1284 |
| ENSDARG00000026759 | ldlr              | 1.46417277  | 3.71E-05    | ZDB-GENE-040426-1254 |
| ENSDARG00000029204 | tyrp1a            | 1.474365614 | 2.00E-05    | ZDB-GENE-070718-2    |
| ENSDARG00000013921 | frya              | 1.536832985 | 0.000913177 | ZDB-GENE-060510-4    |
| ENSDARG00000087401 | slc25a34          | 1.589549351 | 0.000149647 | ZDB-GENE-040426-1442 |
| ENSDARG00000090544 | CABZ01085658.1    | 1.627872459 | 0.000169904 |                      |
| ENSDARG00000077368 | slc30a6           | 1.660849318 | 1.44E-05    | ZDB-GENE-040426-1838 |
| ENSDARG00000103464 | pggt1b            | 1.703944502 | 3.57E-07    | ZDB-GENE-050913-85   |
| ENSDARG00000020239 | lpin1             | 1.717408873 | 0.001070018 | ZDB-GENE-080722-2    |
| ENSDARG00000046024 | pym1              | 1.755277237 | 2.14E-07    | ZDB-GENE-040426-1464 |
| ENSDARG00000017367 | rhbdf1b           | 1.836021455 | 1.07E-07    | ZDB-GENE-130531-6    |
| ENSDARG00000113649 | actb1             | 1.881919676 | 1.71E-05    | ZDB-GENE-000329-1    |
| ENSDARG00000041304 | trak1a            | 1.950389019 | 0.000944202 | ZDB-GENE-100922-182  |
| ENSDARG00000020845 | tns1b             | 2.050211491 | 0.00015886  | ZDB-GENE-030131-6933 |
| ENSDARG00000070834 | taf13             | 2.116550061 | 3.38E-09    | ZDB-GENE-030131-2873 |
| ENSDARG00000111458 | wu:fi09b08        | 2.216227623 | 0.001256655 | ZDB-GENE-030131-5630 |
| ENSDARG00000105341 | si:dkey-9l20.3    | 2.322966385 | 4.15E-05    | ZDB-GENE-090313-369  |
| ENSDARG00000101799 | si:ch1073-82l19.1 | 2.335118093 | 0.004870059 | ZDB-GENE-030131-5941 |
| ENSDARG00000112284 | AL935186.7        | 2.51913611  | 8.50E-06    |                      |
| ENSDARG00000116076 | FO704772.2        | 3.346671885 | 2.17E-06    |                      |
| ENSDARG00000012306 | syt13             | 3.673025499 | 0.000450768 | ZDB-GENE-050417-135  |
| ENSDARG00000038728 | ch25hl2           | 4.274294692 | 0.001498134 | ZDB-GENE-080204-82   |
| ENSDARG00000057143 | nradd             | 5.252442372 | 0.000608766 | ZDB-GENE-030131-2537 |
| ENSDARG00000076104 | sema4bb           | 5.545730168 | 0.001289387 | ZDB-GENE-120503-1    |
| ENSDARG00000094605 | si:ch211-154e10.1 | 5.657330342 | 8.43E-05    | ZDB-GENE-081104-136  |
| ENSDARG00000079884 | trim107           | 6.043260797 | 0.000282885 | ZDB-GENE-110919-5    |
| ENSDARG00000117149 | neurod4           | 8.602986421 | 7.78E-08    | ZDB-GENE-030730-1    |
| ENSDARG00000052610 | olig4             | 8.842947263 | 3.61E-08    | ZDB-GENE-030131-3580 |
| ENSDARG00000109439 | gucy1a1           | 8.879578498 | 0.001903355 | ZDB-GENE-050417-230  |
| ENSDARG00000115893 | BX004787.1        | 9.71693913  | 0.000631992 |                      |
| ENSDARG00000058464 | rasd3             | 9.759533075 | 0.000562081 | ZDB-GENE-060818-9    |
| ENSDARG00000114428 | slc35c2           | 10.28750789 | 0.000247448 | ZDB-GENE-030131-2202 |
| ENSDARG00000115748 | BX322566.3        | 11.30635592 | 5.49E-05    |                      |
| ENSDARG00000115484 | clta              | 12.13298202 | 2.31E-05    | ZDB-GENE-040426-1986 |
| ENSDARG00000110705 | srsf7a            | 12.9219612  | 4.89E-06    | ZDB-GENE-040426-1798 |

**Table S3.** Top 10 significantly enriched pathways in *tlr2*<sup>+/+</sup> larvae by GSEA analysis

| Name                                           | Systematic name | NES      | FDR q-value | Description                                                                                                                                                                                                                                                                                                       |
|------------------------------------------------|-----------------|----------|-------------|-------------------------------------------------------------------------------------------------------------------------------------------------------------------------------------------------------------------------------------------------------------------------------------------------------------------|
| KEGG_VALINE_LEUCINE_AND_ISOLEUCINE_DEGRADATION | M11835          | -3.18239 | 0           | Amino acid metabolism                                                                                                                                                                                                                                                                                             |
| KEGG_GLYCOLYSIS_GLUconeogenesis                | M11521          | -3.06106 | 0           | Carbohydrate metabolism: Glycolysis is the process of converting glucose into pyruvate and generating small amounts of ATP (energy) and NADH (reducing power).                                                                                                                                                    |
| WP_TRANSLATION_FACTORS                         | M3942           | -2.99138 | 7.41E-04    | Protein synthesis is the ultimate step of gene expression and a key control point for regulation. In particular, it enables cells to rapidly manipulate protein production without new mRNA synthesis, processing, or export. This pathway gives an overview of the translation factors involved in this process. |
| SHEPARD_CRASH_AND_BURN_MUTANT_UP               | M1082           | -2.91601 | 0.003629    | Human orthologs of BMYB target genes in zebra fish, identified as commonly changed in the BMYB loss of function mutant crb ('crush and burn') and after knockdown of BMYB by morpholino.                                                                                                                          |
| RHEIN_ALL_GLUcOCORTICOID_THERAPY_DN            | M1859           | -2.8598  | 0.007154    | Genes down-regulated in ALL (acute lymphoblastic leukemia) blasts after 1 week of treatment with glucocorticoids.                                                                                                                                                                                                 |
| MARKEY_RB1_ACUTE_LOF_UP                        | M15606          | -2.78584 | 0.014707    | Genes up-regulated in adult fibroblasts with inactivated RB1 by Cre-lox: acute loss of function (LOF) of RB1.                                                                                                                                                                                                     |
| WP_TRYPTOPHAN_METABOLISM                       | M39500          | -2.76486 | 0.015475    | This pathway describes the metabolism of tryptophan, an essential amino acid.                                                                                                                                                                                                                                     |
| KEGG_FATTY_ACID_METABOLISM                     | M699            | -2.7604  | 0.013819    | Lipid metabolism                                                                                                                                                                                                                                                                                                  |
| MANALO_HYPOXIA_DN                              | M18562          | -2.74929 | 0.013652    | Genes down-regulated in response to both hypoxia and overexpression of an active form of HIF1A.                                                                                                                                                                                                                   |
| KEGG_PYRUVATE_METABOLISM                       | M7934           | -2.72468 | 0.015652    | Carbohydrate metabolism                                                                                                                                                                                                                                                                                           |

Note: NES: Normalized Enrichment Score. FDR q-value: False Discovery Rate method of correction for multiple testing. Setting the FDR q-value < 0.01 as the cutoff to find significantly enriched gene sets.

**Table S4.** Top 10 significantly enriched pathways in *tlr2*<sup>-/-</sup> larvae by GSEA analysis

| Name                                                                   | Systematic name | NES      | FDR q-value | Description                                                                                                                          |
|------------------------------------------------------------------------|-----------------|----------|-------------|--------------------------------------------------------------------------------------------------------------------------------------|
| WP_CYTOPLASMIC_RIBOSOMAL_PROTEINS                                      | M39495          | 5.488139 | 0           | Translation                                                                                                                          |
| KEGG_RIBOSOME                                                          | M189            | 5.351484 | 0           | Ribosome                                                                                                                             |
| REACTOME_SELENOAMINO_ACID_METABOLISM                                   | M27170          | 5.340363 | 0           | Metabolism Selenoamino acids                                                                                                         |
| REACTOME_SRP_DEPENDENT_COTRANSLOCATIONAL_PROTEIN_TARGETING_TO_MEMBRANE | M567            | 5.257831 | 0           | Translation                                                                                                                          |
| REACTOME_EUKARYOTIC_TRANSLATION_ELONGATION                             | M29556          | 5.246786 | 0           | Translation                                                                                                                          |
| REACTOME_RESPONSE_OF_EIF2AK4_GCN2_TO_AMINO_ACID_DEFICIENCY             | M27686          | 5.224345 | 0           | Cellular response to starvation                                                                                                      |
| REACTOME_INFLUENZA_INFECTION                                           | M4669           | 5.158294 | 0           | Infectious disease                                                                                                                   |
| REACTOME_NONSENSE_MEDIATED_DECAY_NMD                                   | M1067           | 4.971412 | 0           | The Nonsense-Mediated Decay (NMD) pathway activates the destruction of mRNAs containing premature termination codons (PTCs)          |
| REACTOME_EUKARYOTIC_TRANSLATION_INITIATION                             | M27686          | 4.818882 | 0           | Translation                                                                                                                          |
| REACTOME_REGULATION_OF_EXPRESSION_OF_SLITS_AND_ROBOS                   | M27876          | 4.58654  | 0           | Expression of SLIT and ROBO proteins is regulated at the level of transcription, translation and protein localization and stability. |

Note: NES: Normalized Enrichment Score. FDR q-value: False Discovery Rate method of correction for multiple testing. Setting the FDR q-value < 0.01 as the cutoff to find significantly enriched gene sets.

**Table S5.** 29 differentially expressed metabolites in *tlr2*<sup>-/-</sup> versus *tlr2*<sup>+/+</sup> zebrafish larvae groups.

| HMDB ID     | Metabolite name       | log2 Fold Change | P value     |
|-------------|-----------------------|------------------|-------------|
| HMDB0001389 | Melatonin             | -0.870716983     | 0.00737003  |
| HMDB0000139 | Glycerate             | -0.730487799     | 0.0170277   |
| HMDB0000123 | Glycine               | 0.501108449      | 0.0212432   |
| HMDB0000650 | 2-Aminobutyrate       | 0.647698256      | 0.0438577   |
| HMDB0000684 | Kynurenine            | 0.838719093      | 0.0325465   |
| HMDB0000254 | Succinate             | 0.849757364      | 0.0134592   |
| HMDB0000362 | 2-Phosphoglycerate    | 0.906744196      | 0.00293618  |
| HMDB0001487 | NADH                  | 1.053637964      | 0.00429618  |
| HMDB0000122 | Glucose               | 1.150958365      | 0.0162585   |
| HMDB0000197 | Indole-3-acetate      | 1.172639386      | 0.000367466 |
| HMDB0000224 | O-Phosphoethanolamine | 1.227068909      | 0.00368356  |
| HMDB0000112 | 4-Aminobutyrate       | 1.237098354      | 0.000957455 |
| HMDB0000687 | Leucine               | 1.285589984      | 0.00402587  |
| HMDB0033780 | Asparagine            | 1.36962882       | 0.00999398  |
| HMDB0000042 | Acetate               | 1.478717078      | 0.0205411   |
| HMDB0000191 | Aspartate             | 1.557556343      | 0.00267089  |
| HMDB0304356 | Formate               | 1.563109087      | 0.0116735   |
| HMDB0000143 | Galactose             | 1.590993483      | 0.0118101   |
| HMDB0000148 | Glutamate             | 1.723693237      | 0.00287398  |
| HMDB0000167 | Threonine             | 1.833003509      | 0.00334483  |
| HMDB0000883 | Valine                | 1.924776666      | 0.000342496 |
| HMDB0000161 | Alanine               | 2.054707706      | 0.000136682 |
| HMDB0003423 | Glutamine             | 2.186947544      | 0.000247798 |
| HMDB0000158 | Tyrosine              | 2.388317711      | 0.0184276   |
| HMDB0000190 | Lactate               | 2.446310033      | 0.00222552  |
| HMDB0000149 | Ethanolamine          | 2.629859039      | 0.00782938  |
| HMDB0000064 | Creatine              | 2.655119001      | < 0.0001    |
| HMDB0000156 | Malate                | 4.375734539      | 0.0002337   |
| HMDB0000251 | Taurine               | 4.91040508       | < 0.0001    |
